# Supplementary material for: Clinical Characteristics of Early-Onset and Late-Onset Leigh Syndrome
Source: PubMed Central journal article supplement (PMC7174756; doi:10.3389/fneur.2020.00267), 2020-04-15
Supplement: Table_1.pdf [file Table_1.pdf]

**Table 1. Mitochondrial DNA(mtDNA) mutations in Leigh syndrome patients**

| mtDNA mutations | Total (N=22) |
|-----------------|--------------|
| 10191 T>C       | 4/22 (18.2%) |
| 13513 G>A       | 4/23 (18.2%) |
| 8993 T>G        | 4/22(18.2%)  |
| 8993 T>C        | 3/22 (13.6%) |
| 9176 T>C        | 3/22 (13.6%) |
| 3697 G>A        | 2/22 (9.1%)  |
| 10158 T>C       | 1/22 (4.5%)  |
| 11777 C>A       | 1/22 (4.5%)  |
