# Supplementary material for: Clinical Characteristics of Early-Onset and Late-Onset Leigh Syndrome
Source: PubMed Central journal article supplement (PMC7174756; doi:10.3389/fneur.2020.00267), 2020-04-15
Supplement: Table_2.pdf [file Table_2.pdf]

**Table 2. Nuclear DNA(nDNA) mutations of *SURF1* gene in Leigh syndrome patients**

| Patient* | Allele 1       | Allele 2       |
|----------|----------------|----------------|
| 1        | c.367_368delAG | c.844T>C       |
| 2        | c.54+1G>T      | c.809_826dup18 |
| 3        | c.54+1G>T      | c.831delC      |

\* Genetic testing of nDNA was performed in 28 out of 110 patients with Leigh syndrome. Three patients (10.7%) showed nDNA mutation and all had *SURF1* gene mutation.
